# Supplementary material for: Radiation-induced microrna-622 causes radioresistance in colorectal cancer cells by down-regulating Rb
Source: PubMed Central journal article supplement (PMC4599251; doi:10.18632/oncotarget.3762), 2015-04-18
Supplement: oncotarget-06-15984-s001.pdf [file oncotarget-06-15984-s001.pdf]

SUPPLEMENTARY FIGURES AND TABLE

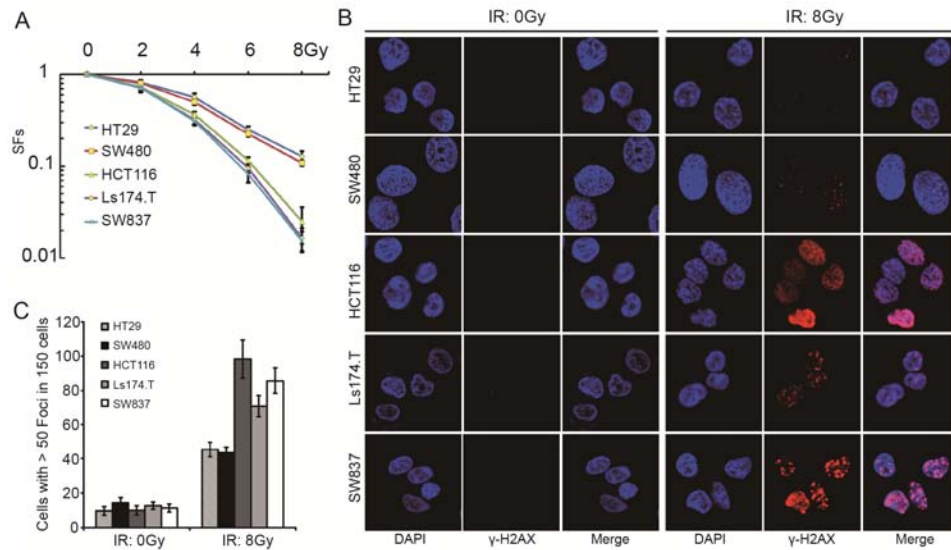

**Supplementary Figure S1: SFs and  $\gamma$ -H2AX expression of five CRC cell lines in response to IR.** A. SFs of five CRC cell lines were irradiated with graded doses of X-rays. SFs was calculated as the number of colonies counted/(the number of cells seeded  $\times$  plating efficiency/100). B. and C. IF and quantitative analysis of  $\gamma$ -H2AX in five CRC cells. SFs = survival fractions, CRC = colorectal cancer, IF = immunofluorescence.

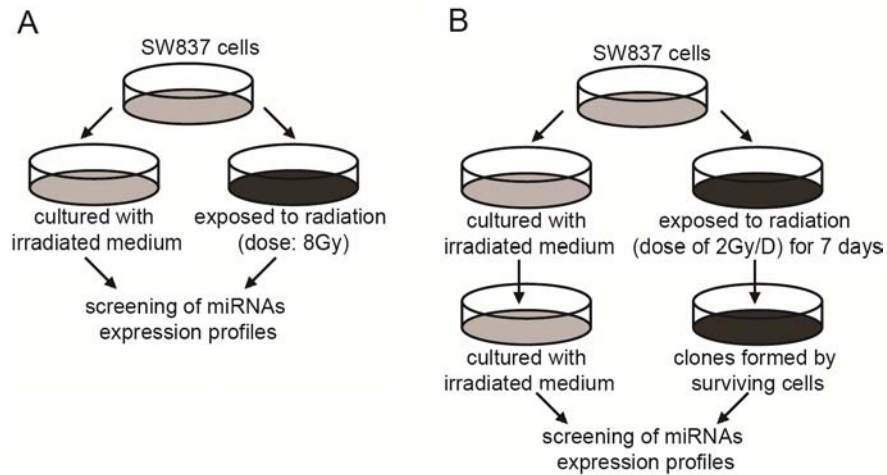

**Supplementary Figure S2: Screening of miRNAs expression profiles.** A. Schematic outline of tumor-related miRNA expression profiles in response to IR of SW837 cells. B. Schematic outline of tumor-related miRNA expression profiles in surviving SW837 cells after IR (2 Gy/day) for 7 days. IR = ionizing radiation.

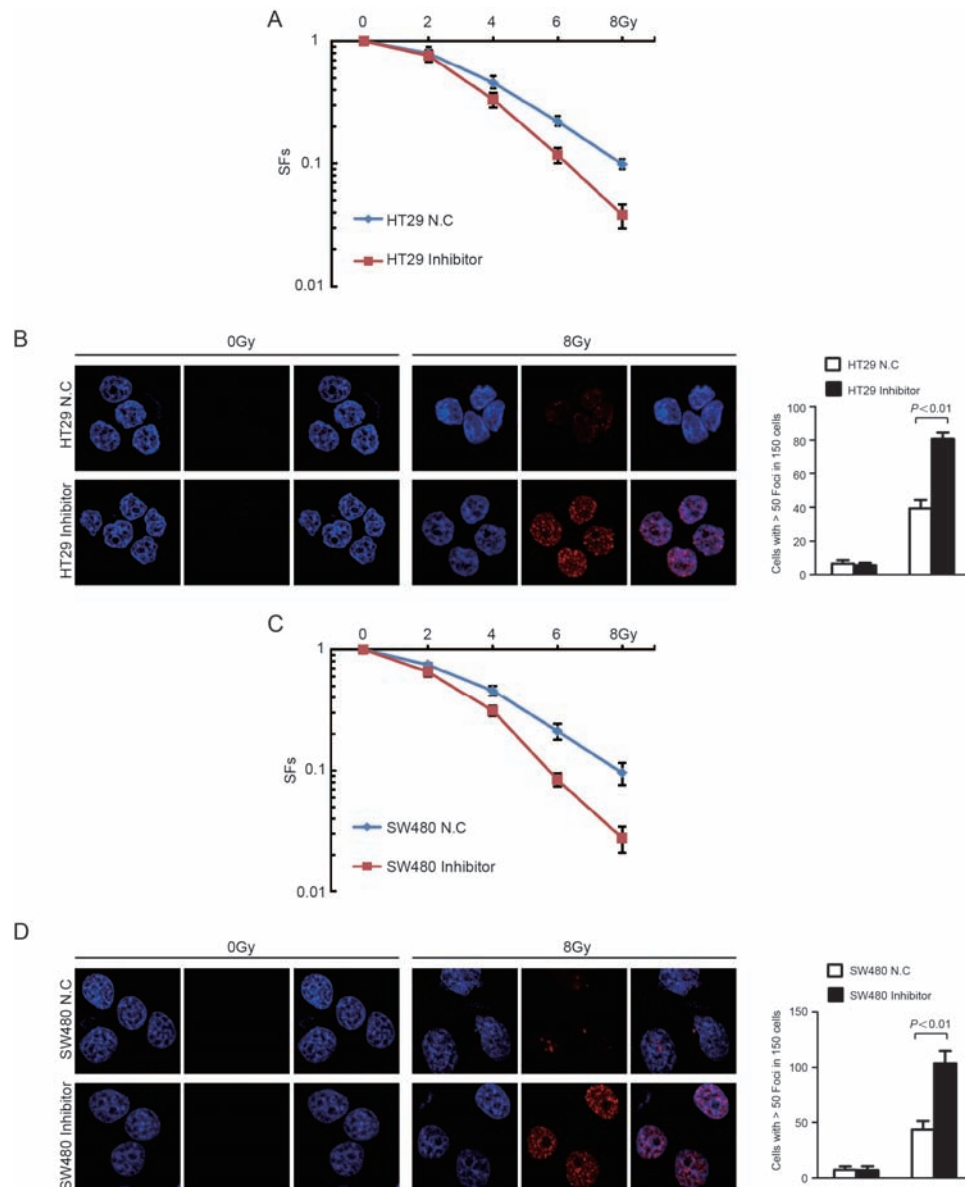

**Supplementary Figure S3: Down-regulation of miRNA-622 promotes radiosensitivity of CRC in vitro.** **A.** SFs of HT29 cells transfected by anti-miR-622 inhibitor and inhibitor control. **B.** IF and quantitative analysis of  $\gamma$ -H2AX in HT29 cells transfected by anti-miR-622 inhibitor and inhibitor control. **C.** SFs of SW480 transfected by anti-miR-622 inhibitors and inhibitor control. **D.** IF and quantitative analysis of  $\gamma$ -H2AX in SW480 cells transfected by anti-miR-622 inhibitors and inhibitor control. SFs = survival fractions, CRC = colorectal cancer, IF = immunofluorescence.

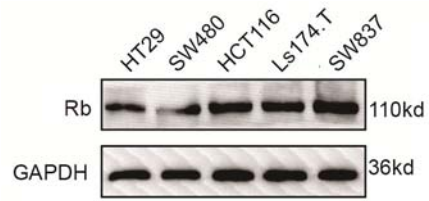

**Supplementary Figure S4: Rb expression of five CRC cell lines.** GAPDH was an internal control. CRC = colorectal cancer.

**Supplementary Table S1.** Sequence of Primer for ChIP, qRT-PCR and 3'UTR PCR

| Gene                    | Sequence                          |
|-------------------------|-----------------------------------|
| <b>ChIP Primer</b>      |                                   |
| hCasp7 forward          | 5'-TTTGGGCACTTGGAGCGCG-3'         |
| hCasp7 reverse          | 5'-AAGAGCCCAAAGCGACCCGT 3'        |
| hTAp73 forward          | 5'-TGAGCCATGAAGATGTGCGAG-3'       |
| hTAp73 reverse          | 5'-GCTGCTTATGGTCTGATGCTTATGG-3'   |
| <b>qRT-PCR Primer</b>   |                                   |
| GAPDH forward           | 5'-CCATCAATGACCCCTTCATTGACC-3'    |
| GAPDH reverse           | 5'-GAAGGCCATGCCAGTGAGCTTCC-3'     |
| TAp73 forward           | 5'-CATGGAGACGAGGACACGTA-3'        |
| TAp73 reverse           | 5'-CTGTAACCCTTGGGAGGTGA-3'        |
| Caspase7 forward        | 5'-GCAGTGGGATTTGTGCTTCT-3'        |
| Caspase7 reverse        | 5'-CCCTAAAGTGGGCTGTCAAA-3'        |
| RB1 forward             | 5'-CTCTCGTCAGGCTTGAGTTTG-3'       |
| RB1 reverse             | 5'-GACATCTCATCTAGGTCAACTGC-3'     |
| <b>3'UTR PCR Primer</b> |                                   |
| E2F1 forward            | 5'-ATTCTGACAGGGCTTGGAGGGACC-3'    |
| E2F1 reverse            | 5'-GGTTTTAATAAATATTTTGATGACGTT-3' |
| E2F8 forward            | 5'-TCAACAGATGTTGGCTTAGTTTAA-3'    |
| E2F8 reverse            | 5'-CAAATTA AAACTTTTCTAAAATATA-3'  |
| RB1 forward             | 5'-TTGTCTCTCACAGATGTGACTGTAT-3'   |
| RB1 reverse             | 5'-AGGTCAAGGGCTTACTATTTCTGGG-3'   |
